# Supplementary material for: Molecular Identification of Trissolcus japonicus, Parasitoid of the Brown Marmorated Stink Bug, by Species-Specific PCR
Source: MDPI journal article supplement (doi:10.3390/insects12050467), 2021-05-18
Supplement: s1 [file s1]

## Supplementary Material

|                                      |                                                                            |
|--------------------------------------|----------------------------------------------------------------------------|
| MK188349 <i>Trissolcus japonicus</i> | TAATTGGATCAGCAATAAGAATATTAAATCCGAATAGAACTAAGAGTTCCAGGTATATTAATTGGTAATGA 70 |
| MK188350 <i>Trissolcus japonicus</i> | TAATTGGATCAGCAATAAGAATATTAAATCCGAATAGAACTAAGAGTTCCAGGTATATTAATTGGTAATGA 70 |
| MK188360 <i>Trissolcus japonicus</i> | TAATTGGATCAGCAATAAGAATATTAAATCCGAATAGAACTAAGAGTTCCAGGTATATTAATTGGTAATGA 70 |
| *****                                |                                                                            |
| MK188349 <i>Trissolcus japonicus</i> | CCAAATTTATAATTCTATTGTAACTTCACATGCATTATTATAATCTTTTTATAGTTATACCAATTATA 140   |
| MK188350 <i>Trissolcus japonicus</i> | CCAAATTTATAATTCTATTGTAACTTCACATGCATTATTATAATCTTTTTATAGTTATACCAATTATA 140   |
| MK188360 <i>Trissolcus japonicus</i> | CCAAATTTATAATTCTATTGTAACTTCACATGCATTATTATAATCTTTTTATAGTTATACCAATTATA 140   |
| *****                                |                                                                            |
| MK188349 <i>Trissolcus japonicus</i> | CTTGGAGGATTTGGAAATTTGATTAATTCCTTTAATAATTAATGCCCCAGATATAGCATTTCACGATTAA 210 |
| MK188350 <i>Trissolcus japonicus</i> | CTTGGAGGATTTGGAAATTTGATTAATTCCTTTAATAATTAATGCCCCAGATATAGCATTTCACGATTAA 210 |
| MK188360 <i>Trissolcus japonicus</i> | CTTGGAGGATTTGGAAATTTGATTAATTCCTTTAATAATTAATGCCCCAGATATAGCATTTCACGATTAA 210 |
| *****                                |                                                                            |
| TJ234F                               |                                                                            |
| MK188349 <i>Trissolcus japonicus</i> | ATAATATAAGATTCTGATTACTAATCCCATCATTAAATTTATTAATCTATAGGAATATCTTTGGATCAGG 280 |
| MK188350 <i>Trissolcus japonicus</i> | ATAATATAAGATTCTGATTACTAATCCCATCATTAAATTTATTAATCTATAGGAATATCTTTGGATCAGG 280 |
| MK188360 <i>Trissolcus japonicus</i> | ATAATATAAGATTCTGATTACTAATCCCATCATTAAATTTATTAATCTATAGGAATATCTTTGGATCAGG 280 |
| *****                                |                                                                            |
| MK188349 <i>Trissolcus japonicus</i> | AAC TGGAACTGGATGAACAGTATACCCCTCTTATCTACTCAATTAATCCCTCTATTGATTTAACTATT 350  |
| MK188350 <i>Trissolcus japonicus</i> | AAC TGGAACTGGATGAACAGTATACCCCTCTTATCTACTCAATTAATCCCTCTATTGATTTAACTATT 350  |
| MK188360 <i>Trissolcus japonicus</i> | AAC TGGAACTGGATGAACAGTATACCCCTCTTATCTACTCAATTAATCCCTCTATTGATTTAACTATT 350  |
| *****                                |                                                                            |
| MK188349 <i>Trissolcus japonicus</i> | TTTTCCTACATATAGCAGGAATTTTCATCTATTCTTAGATCAATCAATTTCTTATGTACAATTATTAATA 420 |
| MK188350 <i>Trissolcus japonicus</i> | TTTTCCTACATATAGCAGGAATTTTCATCTATTCTTAGATCAATCAATTTCTTATGTACAATTATTAATA 420 |
| MK188360 <i>Trissolcus japonicus</i> | TTTTCCTACATATAGCAGGAATTTTCATCTATTCTTAGATCAATCAATTTCTTATGTACAATTATTAATA 420 |
| *****                                |                                                                            |
| MK188349 <i>Trissolcus japonicus</i> | TAAGAAATATATCAATTAATAATTGAACGTTATTACATGATCAATTTAATTACAACAATTTTATTACT 490   |
| MK188350 <i>Trissolcus japonicus</i> | TAAGAAATATATCAATTAATAATTGAACGTTATTACATGATCAATTTAATTACAACAATTTTATTACT 490   |
| MK188360 <i>Trissolcus japonicus</i> | TAAGAAATATATCAATTAATAATTGAACGTTATTACATGATCAATTTAATTACAACAATTTTATTACT 490   |
| *****                                |                                                                            |
| TJ460R                               |                                                                            |
| MK188349 <i>Trissolcus japonicus</i> | TCTATCTTTACCAGTTTTCAGGGGCAATCACTATAATTTTATCAGATCGAAATCTTAATACATCCTTT 560   |
| MK188350 <i>Trissolcus japonicus</i> | TCTATCTTTACCAGTTTTCAGGGGCAATCACTATAATTTTATCAGATCGAAATCTTAATACATCCTTT 560   |
| MK188360 <i>Trissolcus japonicus</i> | TCTATCTTTACCAGTTTTCAGGGGCAATCACTATAATTTTATCAGATCGAAATCTTAATACATCCTTT 560   |
| *****                                |                                                                            |
| MK188349 <i>Trissolcus japonicus</i> | TTTAATCCAGCAGGA 575                                                        |
| MK188350 <i>Trissolcus japonicus</i> | TTTAATCCAGCAGGA 575                                                        |
| MK188360 <i>Trissolcus japonicus</i> | TTTAATCCAGCAGGA 575                                                        |
| *****                                |                                                                            |

Fig. S1. Alignment of TJ234F/TJ460R primers against three *T. japonicus* sequences. CO1 sequence alignment of three North American *T. japonicus* specimens used for primer design and location of primers TJ234F and TJ460R within the sequence.

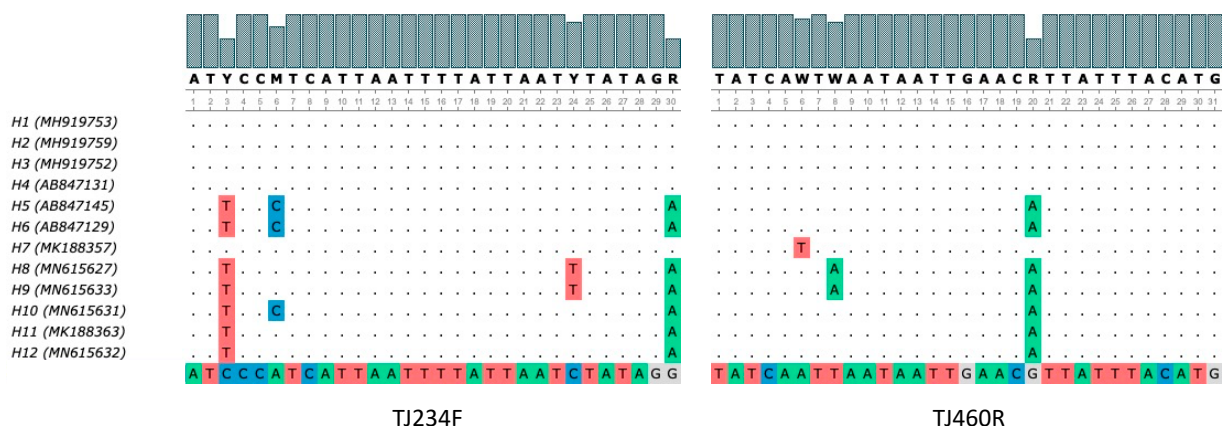

Fig. S2. Alignment between *T. japonicus* CO1 haplotypes and TJ234F/TJ460R primer mismatches. Primers show total homology with ca. 71% of the sequences in the NCBI database, the ones belonging to

haplotypes H1-H4. These haplotypes include all the identified specimens from the US, Canada, Switzerland and Italy, plus variable proportions of Asian *T. japonicus* populations. Following the name of the haplotype, a representative NCBI accession number is specified. The haplotype names are based on Stahl et al. [55] and analysis in this study.

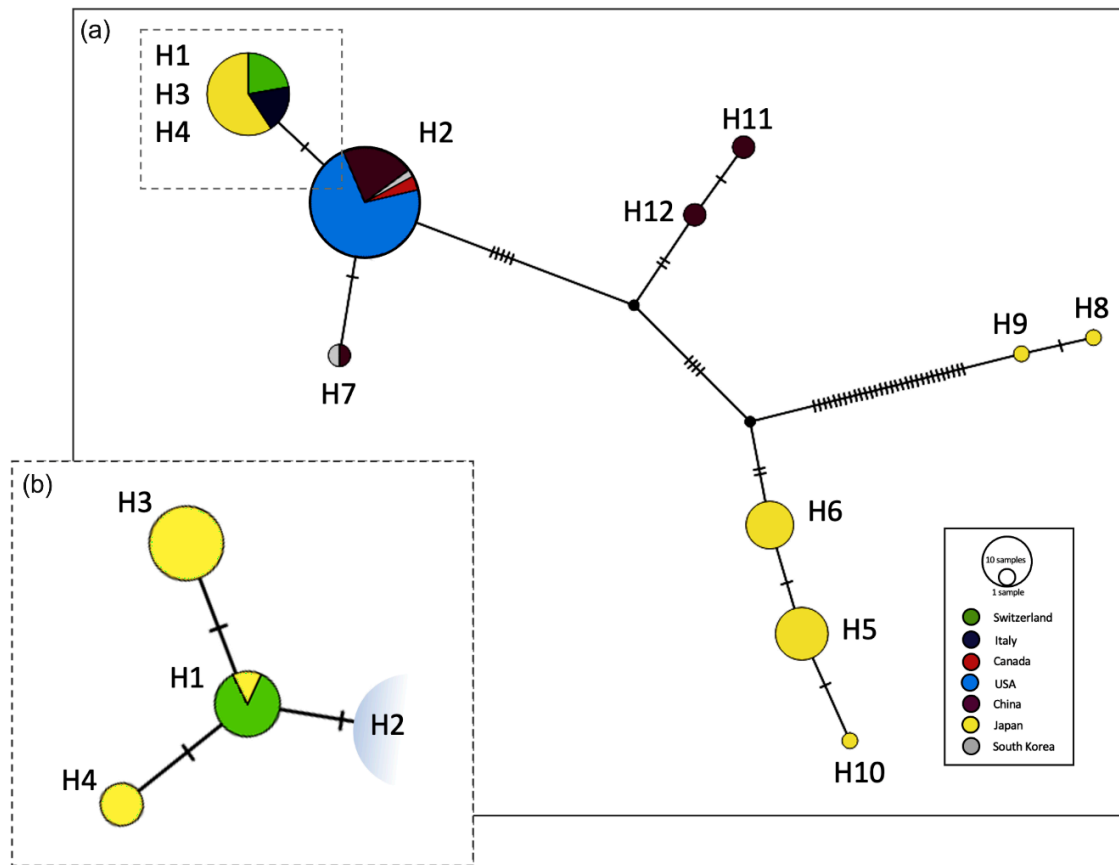

**Fig. S3. Barcode haplotype network of the *T. japonicus* CO1 sequences analyzed in this study.** Each circle corresponds to one haplotype. Circle sizes are proportional to the number of sequences belonging to the haplotype, and each color distinguishes a different geographical origin. Black dots are nodes and hatch marks show the number of mutations between haplotypes. The phylogenetic relationships among haplotypes were established using statistical parsimony in TCS as implemented in PopART software [57]. The analyzed sequences had different lengths and were trimmed before the analysis. In (a), the haplotype network was constructed with 103 *T. japonicus* CO1 sequences of 373 bp. The region of the analyzed CO1 sequences did not allow distinguishing between the haplotypes H1, H3 and H4 described by Stahl et al. [55], who used longer CO1 sequences for the analysis. In (b) the relationship between haplotypes H1, H3, and H4 described by Stahl et al. [55] is represented. In this case, the compared sequences are 423 bp long, and exclude the Italian and Japanese sequences whose short length did not allow their haplotype (H1, H3 or H4) to be elucidated.

|           |                         | Position of Haplotype Markers |     |     |     |     |     |     |     |     |     |     |     |     |     |     |     |     |     |     |     |     |     |     |     |  |  |
|-----------|-------------------------|-------------------------------|-----|-----|-----|-----|-----|-----|-----|-----|-----|-----|-----|-----|-----|-----|-----|-----|-----|-----|-----|-----|-----|-----|-----|--|--|
| Haplotype | Representative sequence | 5                             | 16  | 19  | 29  | 34  | 37  | 55  | 61  | 67  | 73  | 74  | 76  | 91  | 94  | 100 | 103 | 106 | 109 | 115 | 154 | 155 | 160 | 161 | 175 |  |  |
| H1        | MH919753                | T                             | A   | A   | C   | C   | A   | C   | G   | C   | A   | T   | A   | A   | A   | A   | C   | T   | T   | T   | C   | C   | T   | A   | A   |  |  |
| H2        | MH919759                | .                             | .   | .   | .   | .   | .   | .   | .   | .   | .   | .   | .   | .   | .   | .   | .   | .   | .   | .   | .   | .   | .   | .   | .   |  |  |
| H3        | MH919744                | .                             | .   | .   | .   | .   | .   | .   | .   | .   | .   | .   | .   | .   | .   | .   | .   | .   | .   | .   | .   | .   | .   | .   | .   |  |  |
| H4        | AB847131                | .                             | .   | .   | .   | .   | .   | .   | .   | .   | .   | .   | .   | .   | .   | .   | .   | .   | .   | .   | .   | .   | .   | .   | .   |  |  |
| H5        | AB847144                | .                             | .   | .   | .   | T   | C   | .   | A   | .   | .   | .   | .   | .   | G   | .   | T   | .   | .   | .   | .   | T   | .   | G   | .   |  |  |
| H6        | AB847129                | .                             | .   | .   | .   | T   | C   | .   | A   | .   | .   | .   | .   | .   | .   | .   | T   | .   | .   | .   | .   | T   | .   | G   | .   |  |  |
| H7        | MK188357                | .                             | .   | .   | .   | .   | .   | .   | .   | .   | .   | .   | .   | .   | .   | .   | .   | .   | .   | .   | .   | .   | .   | .   | .   |  |  |
| H8        | MN615627                | C                             | G   | G   | T   | T   | .   | T   | A   | T   | G   | .   | C   | .   | .   | T   | .   | A   | A   | A   | A   | T   | C   | G   | T   |  |  |
| H9        | MN615633                | C                             | G   | G   | T   | T   | .   | T   | A   | T   | G   | .   | C   | .   | .   | T   | T   | A   | A   | A   | A   | T   | C   | G   | T   |  |  |
| H10       | MN615631                | .                             | .   | .   | .   | T   | C   | .   | A   | .   | .   | .   | .   | .   | G   | .   | T   | .   | .   | .   | .   | T   | .   | G   | .   |  |  |
| H11       | MK188363                | .                             | .   | .   | .   | T   | .   | .   | A   | .   | .   | G   | .   | G   | .   | .   | .   | .   | .   | .   | .   | .   | .   | G   | .   |  |  |
| H12       | MN615632                | .                             | .   | .   | .   | T   | .   | .   | A   | .   | .   | .   | .   | G   | .   | .   | .   | .   | .   | .   | .   | .   | .   | G   | .   |  |  |
|           |                         |                               |     |     |     |     |     |     |     |     |     |     |     |     |     |     |     |     |     |     |     |     |     |     |     |  |  |
| Haplotype | Representative sequence | 178                           | 187 | 196 | 217 | 233 | 235 | 247 | 278 | 281 | 284 | 286 | 289 | 290 | 310 | 313 | 319 | 329 | 343 | 349 | 355 | 358 | 364 | 367 | 370 |  |  |
| H1        | MH919753                | T                             | A   | T   | T   | A   | T   | G   | A   | T   | T   | A   | T   | C   | C   | G   | C   | T   | T   | T   | C   | T   | T   | A   | A   |  |  |
| H2        | MH919759                | .                             | .   | .   | .   | .   | .   | .   | .   | .   | .   | .   | .   | .   | A   | .   | .   | .   | .   | .   | .   | .   | .   | .   | .   |  |  |
| H3        | MH919744                | .                             | .   | .   | .   | .   | .   | .   | .   | .   | .   | .   | .   | .   | .   | .   | .   | .   | .   | .   | .   | .   | .   | .   | .   |  |  |
| H4        | AB847131                | .                             | .   | .   | .   | .   | .   | .   | .   | .   | .   | .   | .   | .   | .   | .   | .   | .   | .   | .   | .   | .   | .   | .   | .   |  |  |
| H5        | AB847144                | .                             | .   | .   | .   | .   | .   | A   | .   | .   | .   | C   | .   | A   | A   | .   | .   | .   | .   | T   | .   | C   | .   | .   | .   |  |  |
| H6        | AB847129                | .                             | .   | .   | .   | .   | .   | A   | .   | .   | .   | C   | .   | A   | A   | .   | .   | .   | .   | T   | .   | C   | .   | .   | .   |  |  |
| H7        | MK188357                | .                             | .   | .   | .   | T   | .   | .   | .   | .   | .   | .   | .   | .   | A   | .   | .   | .   | .   | T   | .   | C   | .   | .   | .   |  |  |
| H8        | MN615627                | A                             | G   | C   | C   | .   | A   | A   | .   | C   | C   | T   | C   | T   | A   | A   | T   | C   | C   | C   | .   | .   | C   | G   | T   |  |  |
| H9        | MN615633                | A                             | G   | C   | C   | .   | A   | A   | .   | C   | C   | T   | C   | T   | A   | A   | T   | C   | C   | C   | .   | .   | C   | G   | T   |  |  |
| H10       | MN615631                | .                             | .   | .   | .   | .   | .   | A   | .   | .   | .   | C   | .   | .   | A   | A   | .   | .   | .   | .   | T   | C   | C   | .   | .   |  |  |
| H11       | MK188363                | .                             | .   | .   | .   | .   | .   | A   | G   | .   | .   | .   | .   | .   | A   | A   | .   | .   | .   | .   | .   | .   | .   | .   | .   |  |  |
| H12       | MN615632                | .                             | .   | .   | .   | .   | .   | A   | G   | .   | .   | .   | .   | .   | A   | A   | .   | .   | .   | .   | .   | .   | .   | .   | .   |  |  |
|           |                         |                               |     |     |     |     |     |     |     |     |     |     |     |     |     |     |     |     |     |     |     |     |     |     |     |  |  |
| Haplotype | Representative sequence | 374                           | 375 | 376 | 377 | 378 | 379 | 380 | 381 | 382 | 383 | 384 | 385 | 386 | 387 | 388 | 389 | 390 | 391 | 392 | 393 | 394 | 395 | 396 | 397 |  |  |
| H1        | MH919753                | G                             | G   | A   | G   | G   | A   | G   | A   | T   | C   | C   | A   | G   | T   | A   | C   | T   | A   | T   | A   | C   | C   | A   | A   |  |  |
| H2        | MH919759                | .                             | .   | .   | .   | .   | .   | .   | .   | .   | .   | .   | .   | .   | .   | .   | .   | .   | .   | .   | .   | .   | .   | .   | .   |  |  |
| H3        | MH919744                | .                             | .   | .   | .   | .   | .   | .   | .   | .   | .   | .   | .   | .   | .   | .   | .   | .   | .   | .   | .   | .   | .   | .   | .   |  |  |
| H4        | AB847131                | .                             | .   | .   | .   | .   | .   | .   | .   | .   | .   | .   | .   | .   | .   | .   | .   | .   | .   | .   | .   | .   | .   | .   | .   |  |  |
| H5        | AB847144                | .                             | .   | .   | .   | .   | .   | .   | .   | .   | .   | .   | .   | .   | .   | .   | T   | .   | .   | .   | .   | .   | .   | .   | .   |  |  |
| H6        | AB847129                | .                             | .   | .   | .   | .   | .   | .   | .   | .   | .   | .   | .   | .   | .   | .   | T   | .   | .   | .   | .   | .   | .   | .   | .   |  |  |
| H7        | MK188357                | .                             | .   | .   | .   | .   | .   | .   | .   | .   | .   | .   | .   | .   | .   | .   | .   | .   | .   | .   | .   | .   | .   | .   | .   |  |  |
| H8        | MN615627                | .                             | .   | .   | .   | .   | .   | .   | .   | .   | .   | .   | .   | .   | .   | .   | .   | .   | .   | .   | .   | .   | .   | .   | .   |  |  |
| H9        | MN615633                | .                             | .   | .   | .   | .   | .   | .   | .   | .   | .   | .   | .   | .   | .   | .   | .   | .   | .   | .   | .   | .   | .   | .   | .   |  |  |
| H10       | MN615631                | .                             | .   | .   | .   | .   | .   | .   | .   | .   | .   | .   | .   | .   | .   | .   | .   | .   | .   | .   | .   | .   | .   | .   | .   |  |  |
| H11       | MK188363                | .                             | .   | .   | .   | .   | .   | .   | .   | .   | .   | .   | .   | .   | .   | .   | .   | .   | .   | .   | .   | .   | .   | .   | .   |  |  |
| H12       | MN615632                | .                             | .   | .   | .   | .   | .   | .   | .   | .   | .   | .   | .   | .   | .   | .   | .   | .   | .   | .   | .   | .   | .   | .   | .   |  |  |
|           |                         |                               |     |     |     |     |     |     |     |     |     |     |     |     |     |     |     |     |     |     |     |     |     |     |     |  |  |
| Haplotype | Representative sequence | 398                           | 399 | 400 | 401 | 402 | 403 | 404 | 405 | 406 | 407 | 408 | 409 | 410 | 411 | 412 | 413 | 414 | 415 | 416 | 417 | 418 | 419 | 420 | 421 |  |  |
| H1        | MH919753                | C                             | A   | T   | T   | T   | A   | T   | T   | T   | T   | G   | A   | T   | T   | T   | T   | T   | T   | G   | G   | T   | C   | A   | C   |  |  |
| H2        | MH919759                | .                             | .   | .   | .   | .   | .   | .   | .   | .   | .   | .   | .   | .   | .   | .   | .   | .   | .   | .   | .   | .   | .   | .   | .   |  |  |
| H3        | MH919744                | .                             | .   | .   | .   | .   | .   | .   | .   | .   | .   | .   | .   | .   | .   | .   | .   | .   | .   | .   | .   | A   | .   | .   | .   |  |  |
| H4        | AB847131                | .                             | .   | .   | .   | .   | .   | .   | .   | .   | .   | .   | .   | .   | .   | .   | .   | .   | .   | .   | .   | .   | .   | .   | T   |  |  |
| H5        | AB847144                | .                             | .   | .   | .   | .   | .   | .   | .   | .   | .   | .   | .   | .   | .   | .   | .   | .   | .   | .   | .   | .   | .   | .   | .   |  |  |
| H6        | AB847129                | .                             | .   | .   | .   | .   | .   | .   | .   | .   | .   | .   | .   | .   | .   | .   | .   | .   | .   | .   | .   | .   | .   | .   | .   |  |  |
| H7        | MK188357                | .                             | .   | .   | .   | .   | .   | .   | .   | .   | .   | .   | .   | .   | .   | .   | .   | .   | .   | .   | .   | .   | .   | .   | .   |  |  |
| H8        | MN615627                | .                             | .   | .   | .   | .   | .   | .   | .   | .   | .   | .   | .   | .   | .   | .   | .   | .   | .   | .   | .   | .   | .   | .   | .   |  |  |
| H9        | MN615633                | .                             | .   | .   | .   | .   | .   | .   | .   | .   | .   | .   | .   | .   | .   | .   | .   | .   | .   | .   | .   | .   | .   | .   | .   |  |  |
| H10       | MN615631                | .                             | .   | .   | .   | .   | .   | .   | .   | .   | .   | .   | .   | .   | .   | .   | .   | .   | .   | .   | .   | .   | .   | .   | .   |  |  |
| H11       | MK188363                | .                             | .   | .   | .   | .   | .   | .   | .   | .   | .   | .   | .   | .   | .   | .   | .   | .   | .   | .   | .   | .   | .   | .   | .   |  |  |
| H12       | MN615632                | .                             | .   | .   | .   | .   | .   | .   | .   | .   | .   | .   | .   | .   | .   | .   | .   | .   | .   | .   | .   | .   | .   | .   | .   |  |  |

**Fig. S4. Position of haplotype markers in *T. japonicus* CO1 sequence.** For each haplotype, the NCBI accession number of a representative sequence is provided. Haplotype H1 was arbitrary selected as reference. Identical nucleotides are represented with dots. Differences between haplotypes H1-H6 were described by Stahl et al. [55] using CO1 aligned sequences of 423 nucleotides. Sequences representing haplotypes H7-H12 are shorter (dashes in a grey background denote non-available CO1 sequence regions) and can be differentiated from each other and from haplotypes H1-H6 by comparing a shorter region (373 bp).
